# Supplementary material
Source: PubMed Central journal article supplement (PMC6693824)
Supplement: jciinsight-4-127569-s108.pdf [file jciinsight-4-127569-s108.pdf]

# Supplemental Figures and Tables

| Genes         | Sequences                     |
|---------------|-------------------------------|
| IFN $\gamma$  | F: AAAGAGATAATCTGGCTCTGC      |
|               | R: GCTCTGAGACAATGAACGCT       |
| TNF $\alpha$  | F: CTGTAGCCCACGTCGTAGC        |
|               | R: TTGAGATCCATGCCGTTG         |
| IL6           | F: GCTACCAAACCTGGATATAATCAGGA |
|               | R: CCAGGTAGCTATGGTACTCCAGAA   |
| IL12A         | F: TCAGAATCACAACCATCAGCA      |
|               | R: CGCCATTATGATTCAGAGACTG     |
| IL18          | F: CAAACCTTCCAAATCACTTCCT     |
|               | R: TCCTTGAAGTTGACGCAAGA       |
| 18S rRNA      | F: GTAACCCGTTGAACCCCAT        |
|               | R: CCATCCAATCGGTAGTAGCG       |
| $\beta$ Actin | F: TGGAATCCTGTGGCATCCATGAAAC  |
|               | R: TAAAACGCAGCTCAGTAACAGTCCG  |

**Table I: qPCR primer sequences.**

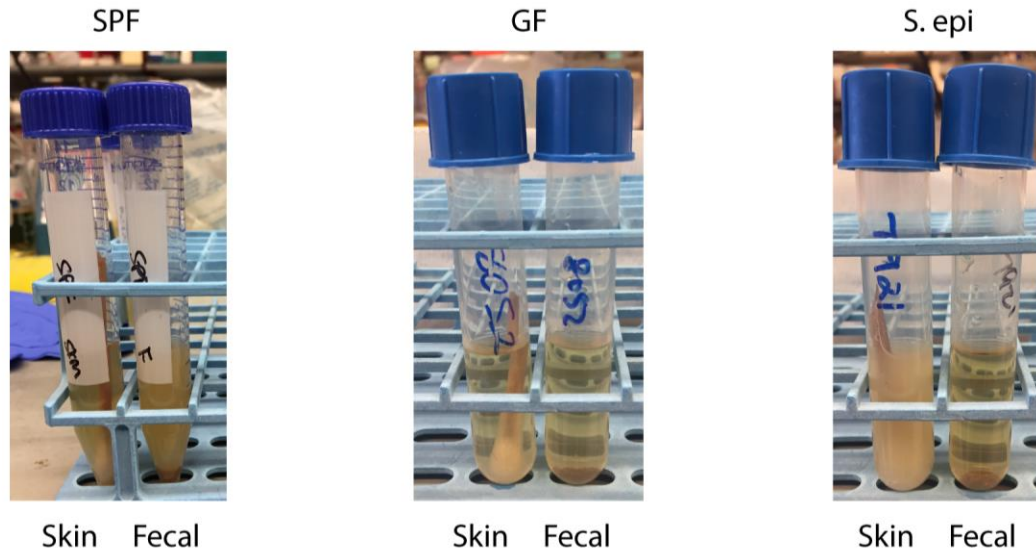

**Supplemental Figure 1. *S. epi* colonized the skin but not the gut of oral vancomycin-treated gnotobiotic mice.** GF mice were painted with *S. epi*. After 10 days, skin swabs and fecal samples were cultured in aerobic conditions overnight. Cloudy broths demonstrate bacterial growth whereas clear broths denote the sterility of the culture.

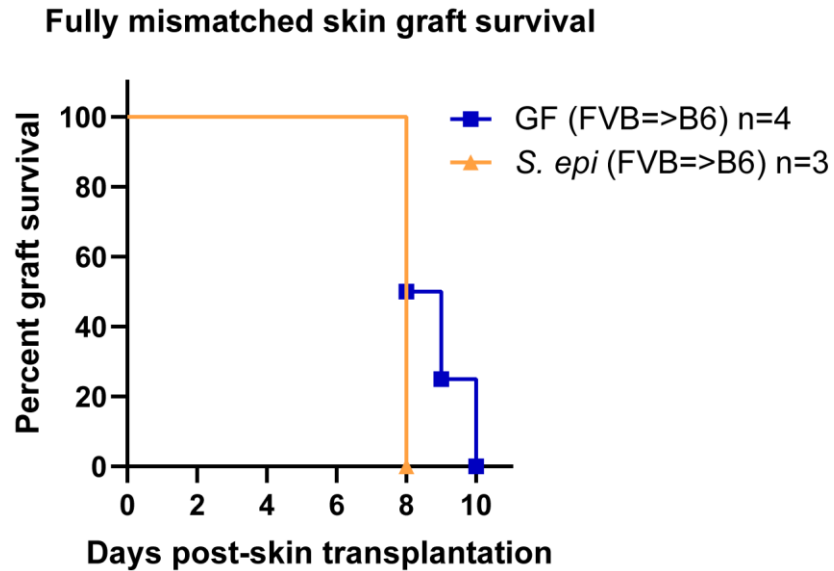

**Supplemental Figure 2. Donor skin *S. epi* trends towards accelerating rejection of a fully mismatched skin graft.** Eight GF FVB male mice (H-2<sup>q</sup>) were put on vancomycin-supplemented water and 4 mice were painted with *S. epi*. After 10 days, skin from GF FVB or cutaneous *S. epi*-monocolonized FVB mice was transplanted onto female C57BL/6 recipients on vancomycin-supplemented water. One recipient died during transplantation. Graft survival was evaluated daily after bandage removal on day 7.  $p=0.1797$  by log rank test.

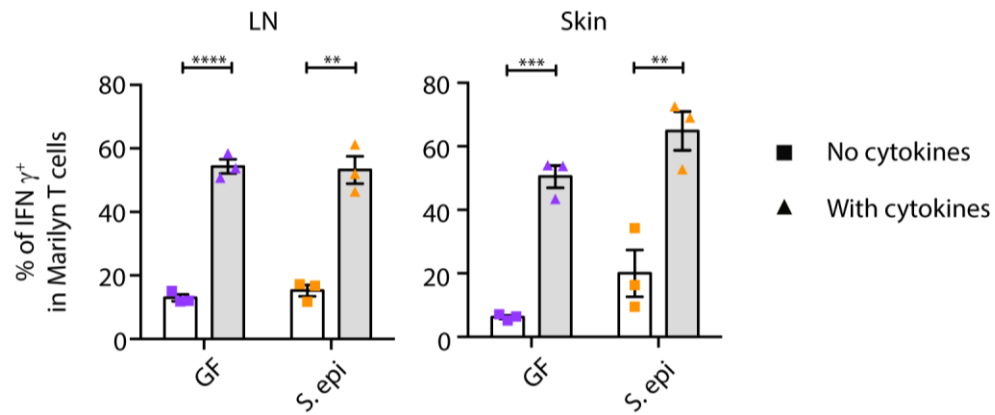

**Supplemental Figure 3. Exogenous addition of inflammatory cytokines results in augmented effector function by donor-reactive T cells.** APCs ( $2 \times 10^5$ ) from the LNs or flank skin of GF and 10 day-painted *S. epi*-monocolonized mice were incubated with Marilyn T cells ( $5 \times 10^4$ ) in the presence or absence of exogenous IL-6+IL-12 for 3 days. Cells were then restimulated with PMA + ionomycin for 4h and analyzed by flow cytometry for IFN $\gamma$  expression by Marilyn T cells. Data represent the mean  $\pm$  SEM. Statistical analysis using the unpaired t-test.

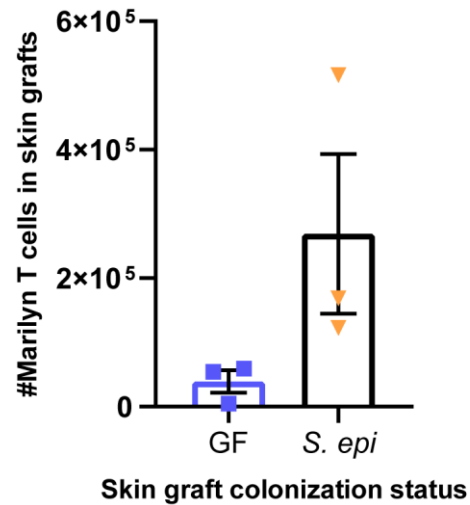

**Supplemental Figure 4. Trend toward increased numbers of donor-reactive T cells in *S. epi*-colonized skin grafts.** Spleen and LNs from CD45.1<sup>+</sup> Marilyn TCR-Tg $\times$ RAG-KO mice were CFSE-labeled and transferred ( $10^6$ ) into GF female C57BL/6 mice 4 days after transplantation with male GF (n=3) or *S.epi*-monocolonized (n=3) skin grafts. Animals were sacrificed on day 10, hematopoietic cells extracted from the skin grafts and CD45.1<sup>+</sup>TCR $\beta$ <sup>+</sup> cells enumerated by flow cytometry. Data represent the mean  $\pm$  SEM.
